# Supplementary material
Source: HighWire-hosted journal article supplement (http://ajnr-stage2.highwire.org/highwire/filestream/90023/field_highwire_adjunct_files/0/1317.pdf)
Supplement: 1317.pdf [file 1317.pdf]

Supplementary Table 1. Operative Cases

| Patient | Orientation | STA | PAA | Age | Gender | Presentation     | KPS/mRS | Postoperative clinical outcome* | PAA Adequacy† |
|---------|-------------|-----|-----|-----|--------|------------------|---------|---------------------------------|---------------|
| Case 1  | Right       | D1  | 4a  | 8   | M      | TIA              | 100/0   | Fair                            | 100%          |
| Case 2‡ | Right       | D1  | 4a  | 6   | F      | TIA              | 100/0   | Excellent                       | 100%          |
|         | Left        | D1  | 4a  |     |        |                  |         |                                 | 100%          |
| Case 3  | Right       | C1  | 4a  | 12  | F      | Headache         | 100/0   | Excellent                       | 100%          |
| Case 4  | Right       | D1  | 3a  | 11  | F      | TIA and Headache | 100/0   | Fair                            | 54%           |
| Case 5  | Left        | C1  | 4a  | 15  | F      | TIA              | 100/0   | Excellent                       | 100%          |
| Case 6  | Left        | D1  | 3a  | 8   | F      | TIA              | 100/0   | Excellent                       | 67%           |
| Case 7  | Right       | D1  | 3a  | 1.7 | M      | Ischemic         | 80/2    | Good                            | 73%           |
| Case 8  | Left        | C1  | 4a  | 5   | F      | TIA              | 100/0   | Excellent                       | 100%          |
| Case 9  | Left        | C1  | 4a  | 10  | F      | TIA and Headache | 100/0   | Excellent                       | 100%          |

\* Based on 1 year postoperative clinical symptoms, asymptomatic without fixed neurological deficit is labeled as “excellent”, asymptomatic with fixed neurological deficit is labeled as “good”, reduced symptoms are labeled as “fair”, and no significant change or worsened symptoms are labeled as “poor”.

† The proportion of PAA termination between the helix and vertex is labeled, where 4a is labeled proportionately as 100%, 3a ranges from 0% to 100%, and the adequate cutoff value for PAA is considered any value above the 50% mark.

‡ Patient showed a bilateral D1+4a combination and underwent bilateral PAA-EDAS
